# Supplementary material
Source: PubMed Central journal article supplement (PMC4612681)
Supplement: kccy-14-13-1041690-s001.pdf [file kccy-14-13-1041690-s001.pdf]

## SUPPLEMENTARY MATERIAL

### Co-expressed Cyclin D variants cooperate to regulate proliferation of germline nuclei in a syncytium.

Subramaniam et al.

**Table S1.** Cyclin accession numbers

| Gene                                | Accession number |
|-------------------------------------|------------------|
| Human Cyclin D1a                    | NP_444284        |
| Mouse Cyclin D2                     | NP_033959        |
| Mouse Cyclin D2SV                   | AK007904         |
| <i>O. dioica</i> Cyclin Db $\alpha$ | CBZ41121         |
| <i>O. dioica</i> Cyclin Db $\beta$  | CBZ41122         |
| <i>O. dioica</i> Cyclin Db Y        | CBZ41123         |
| <i>O. dioica</i> Cyclin Db $\delta$ | CBZ41124         |

The human Cyclin D1b protein sequence was obtained from Lu et al <sup>1</sup>

**Table S2.** Primer sequences for qPCR

| Target Transcript         | Primer Name | Primer Sequence (5' to 3') |
|---------------------------|-------------|----------------------------|
| Cyclin Da                 | CCQ73F      | ACATGGAGCTGCTGATCCTGTTGA   |
|                           | CCQ74R      | ACATCAGCGTACGTAGAAAGCGTGA  |
| Cyclin Db                 | CCQ385F     | AGAGATCAAACGCGCTTATTGGAG   |
|                           | CCQ386R     | CTGCGCTGGATCTTTGAGACTTTG   |
| Cyclin Db $\gamma/\delta$ | CCQ77F      | GTCTCAAAGATCCAGCGCAGGTAA   |
|                           | CCQ78R      | AAACAAGGCACGTGAGCGCATAAG   |
| Cyclin Db $\alpha/\gamma$ | CCQ344F     | ACATGCTGGAGGAGCTTCTTCCTT   |
|                           | CC220R      | CCTGGAAGAGTTGAACAGGACTG    |
| Cyclin Dc                 | CCQ69F      | TGACCACACAACACTACAGCATCCGA |
|                           | CCQ70R      | CTGCAGTAACAACAGCAGGCCGAAA  |
| Cyclin Dd                 | CCQ87F      | TCCTGTCTATATCTGGCCGCGAAA   |
|                           | CCQ88R      | GGGCTTGGCAGAAGAGAAGAATGA   |
| EF1 $\beta$               | CCQ43F      | AGGTCATCCCTGAACTTAACGGCA   |
|                           | CCQ44R      | GGCAGATTTGATGGCAGCGTTGAT   |

**Table S3.** Primer sequences for cloning.

| <b>Construct</b>      | <b>Primer</b>  | <b>Primer Sequence (5' to 3')</b>                        |
|-----------------------|----------------|----------------------------------------------------------|
| Cyclin Db $\beta$ ORF | Db $\beta$ _OF | GATATCTAATACGACTCACTATAGGGAGAGCCACCATGGAAGCTACACACGAATCA |
|                       | Db $\beta$ _OR | CTCCAGATTACTGTAATGGCCCGAACATGGATCCGCTGCC                 |
| Cyclin Db $\beta$ UTR | Db $\beta$ _UF | TGTACAAGTAGAACGGCTTTTTATCCTGATTTTGTAGAA                  |
|                       | Db $\beta$ _UR | TTTTTGAAATAAATAAATAGAATACATTTTTTAAACGCCCGGG              |
| CKIa ORF              | CKIa_OF        | GATATCTAATACGACTCACTATAGGGAGAGCCACCATGAAATCGGGCGGGAATTCG |
|                       | CKIa_OR        | GGCAGCGGATCCATGGTGGCCGACGAGCGA                           |
| CKIa UTR              | CKIa_UF        | TGTACAAGTAGAACTTTTGGCAGCTCCATATTATATTGTACTGCTGTTCTAC     |
|                       | CKIa_UR        | TGCGATATGCGTTATGCGATTTTAAACCCTTCCCGGG                    |

Hs CyclinD1a 1 -----MEQLLCEVETIR  
Hs CyclinD1b 1 -----MEQLLCEVETIR  
Mm CyclinD2 1 -----MELTCEVDPVR  
Mm CyclinD2SV 1 -----MELTCEVDPVR  
Od CyclinDby 1 -----MEATHEFKSQSKLP  
Od CyclinDba 1 -----MEATHEFKSQSKLP  
Od CyclinDbd 1 -----MEATHEFKSQSKLP  
Od CyclinDbf 1 -----MEATHEFKSQSKLP  
Od CyclinDd 1 TTAVKQVQUALTERKNSRRRSVQRQNSDDESSVQQTIKRRSMGPEVPSVKLVRVLDLKE

Hs CyclinD1a 15 RAYFD-----  
Hs CyclinD1b 15 RAYFD-----  
Mm CyclinD2 13 RAYFD-----  
Mm CyclinD2SV 13 RAYFD-----  
Od CyclinDby 17 AVNLSFIFLLCGKIIAFYFVTRCLEVSPVSTLPESKFKLTLMRSRALFEARGPHIPRS  
Od CyclinDba 17 AAINP-----  
Od CyclinDbd 17 AVNLSFIFLLCGKIIAFYFVTRCLEVSPVSTLPESKFKLTLMRSRALFEARGPHIPRS  
Od CyclinDbf 17 AAINP-----  
Od CyclinDd 61 LQAAGSSQDRLEPLRDFNENERKKVKARRRSIATPTITSIKEKSETPVKEDKPILPN

Hs CyclinD1a 20 -----ALNDR-VLRAMLKAEETCAPSVS-----YKCE-----VQKEV  
Hs CyclinD1b 20 -----ALNDR-VLRAMLKAEETCAPSVS-----YKCE-----VQKEV  
Mm CyclinD2 18 -----RLLELR-VLQNLTLTEERYTEQCS-----YKCE-----VQKDI  
Mm CyclinD2SV 18 -----RLLELR-VLQNLTLTEERYTEQCS-----YKCE-----VQKDI  
Od CyclinDby 77 INPASLLNIHLSSHQAHYVWNRCCVKEDEGKILAFGIPEDIN-----DAMCC  
Od CyclinDba 22 ---ASLLNIHLSSHQAHYVWNRCCVKEDEGKILAFGIPEDIN-----DAMCC  
Od CyclinDbd 77 INPASLLNIHLSSHQAHYVWNRCCVKEDEGKILAFGIPEDIN-----DAMCC  
Od CyclinDbf 22 ---ASLLNIHLSSHQAHYVWNRCCVKEDEGKILAFGIPEDIN-----DAMCC  
Od CyclinDd 121 LENLTLTEDEENSTEGLEPKESARRCFEYQCLYRGMVNDLITVPELSIYNPHDPATEGKV

Hs CyclinD1a 53 PPSMRKIVATWMLVCECEKCEHEVFFPLAMNYLDRHLSL-EPVKKSRLLGLGATCMFVAS  
Hs CyclinD1b 53 PPSMRKIVATWMLVCECEKCEHEVFFPLAMNYLDRHLSL-EPVKKSRLLGLGATCMFVAS  
Mm CyclinD2 51 QPMRRIVATWMLVCECEKCEHEVFFPLAMNYLDRHLAG-VETPKSHLQLLGAVCMFVAS  
Mm CyclinD2SV 52 QPMRRIVATWMLVCECEKCEHEVFFPLAMNYLDRHLAG-VETPKSHLQLLGAVCMFVAS  
Od CyclinDby 128 MKFRQMTVDWARGVCEVTSNCLASVFFHAKKDFDRVLT-TECRYSHLQSIIASMLIAS  
Od CyclinDba 70 MKFRQMTVDWARGVCEVTSNCLASVFFHAKKDFDRVLT-TECRYSHLQSIIASMLIAS  
Od CyclinDbd 128 MKFRQMTVDWARGVCEVTSNCLASVFFHAKKDFDRVLT-TECRYSHLQSIIASMLIAS  
Od CyclinDbf 70 MKFRQMTVDWARGVCEVTSNCLASVFFHAKKDFDRVLT-TECRYSHLQSIIASMLIAS  
Od CyclinDd 181 TEHFRGILLIEWLEVATEEKYRRITTEHLAMSLDRITYYRKIIIPKSLQLGLGTSCLYIAA

Hs CyclinD1a 112 KMKETIPLTAEKLCIYFDNSIRPEELIQMELLVNLKKNAAATPHDEIEHFSKQPEA  
Hs CyclinD1b 112 KMKETIPLTAEKLCIYFDNSIRPEELIQMELLVNLKKNAAATPHDEIEHFSKQPEA  
Mm CyclinD2 110 KMKETIPLTAEKLCIYFDNSVQKPOLLEWEVVLGKLNAAATPHDEIEHFSKQPEA  
Mm CyclinD2SV 111 KMKETIPLTAEKLCIYFDNSVQKPOLLVPPSLLTFFPLLRFFH-----  
Od CyclinDby 187 KRETIVLGIIRLVALIKYSYDERMIDKVENVLLKLHEDVSEVTFPDEYPTIIDILHAS  
Od CyclinDba 129 KRETIVLGIIRLVALIKYSYDERMIDKVENVLLKLHEDVSEVTFPDEYPTIIDILHAS  
Od CyclinDbd 187 KRETIVLGIIRLVALIKYSYDERMIDKVENVLLKLHEDVSEVTFPDEYPTIIDILHAS  
Od CyclinDbf 129 KRETIVLGIIRLVALIKYSYDERMIDKVENVLLKLHEDVSEVTFPDEYPTIIDILHAS  
Od CyclinDd 241 KREIVNPTIYRIVVEYSGAVTIDDLWKIEFDMLRHLKWRVATTPLSHILLFCQAPEFW

Hs CyclinD1a 172 ENKQIRKHAQTFVLCATDKFISNPP----SMVAAG-----SVVAAGQGLN  
Hs CyclinD1b 172 ENKQIRKHAQTFVLCATDKFISNPP----SMVAAG-----SVVAAGQGLN  
Mm CyclinD2 170 KEKLSIRKHAQTFVLCATDFKFAMYPP----SMIATG-----SVGAAGCGLQ  
Mm CyclinD2SV 170 KEKLSIRKHAQTFVLCATDFKFAMYPP----SMIATG-----SVGAAGCGLQ  
Od CyclinDby 247 DRSKTEAASSYMLEELLPCNKAALA----LAQDSEMVSHKPSIMAVCSLSVFLCK  
Od CyclinDba 189 DRSKTEAASSYMLEELLPCNKAALA----LAQDSEMVSHKPSIMAVCSLSVFLCK  
Od CyclinDbd 247 DRSKTEAASSYMLEELLPCNKAALA----LAQD-----  
Od CyclinDbf 189 DRSKTEAASSYMLEELLPCNKAALA----LAQD-----  
Od CyclinDd 301 NEFSVMEFRNEKLLCFCATILDLTKLDPISYQWNAIVLGGSVFIRVLFVEAHREIRQEM

Hs CyclinD1a 217 LSPNNFISYYRLTRFLSRVHKCPDCR--ACQDQHEALLESSLRQAQNMDPKAAEVEE  
Hs CyclinD1b 217 LSPNNFISYYRLTRFLSRVHKCPVSEGD--VPGSLAGAYRGRHLVPRKCRGWCPQGPQ  
Mm CyclinD2 215 QDDEVNTTCDALTELLAKITTEVDCIK--ACQDQHEALLNSLQFRQEQHNAESKSV  
Mm CyclinD2SV 215 QDDEVNTTCDALTELLAKITTEVDCIK--ACQDQHEALLNSLQFRQEQHNAESKSV  
Od CyclinDby 302 MIIINSFVQLFQALCPFITTRGDSPEIR--KQWISCMQWQNFARVPATISPTLASQSR  
Od CyclinDba 244 MIIINSFVQLFQALCPFITTRGDSPEIR--KQWISCMQWQNFARVPATISPTLASQSR  
Od CyclinDbd 280 -----PRRFS--RASKMGOHAALAEFCARSSNNEDFG-  
Od CyclinDbf 222 -----PRRFS--RASKMGOHAALAEFCARSSNNEDFG-  
Od CyclinDd 361 NDCSMEITDNKITEILISSTACHSDSQNACCDYVTPFVAYFMKDILTIKCGENARL

Hs CyclinD1a 275 EEEEEVDLACTPTDVRDVL-----  
Hs CyclinD1b 275 EEEEEVDLACTPTDVRDVL-----  
Mm CyclinD2 273 EDPDQATPTDVRDVL-----  
Mm CyclinD2SV 273 EDPDQATPTDVRDVL-----  
Od CyclinDby 360 PVNDSSAAPRFHEPVSQIQLKLTASDTRADHMIVDGDPPDRDSGHYSNLE-----  
Od CyclinDba 302 PVNDSSAAPRFHEPVSQIQLKLTASDTRADHMIVDGDPPDRDSGHYSNLE-----  
Od CyclinDbd 360 PVNDSSAAPRFHEPVSQIQLKLTASDTRADHMIVDGDPPDRDSGHYSNLE-----  
Od CyclinDbf 360 PVNDSSAAPRFHEPVSQIQLKLTASDTRADHMIVDGDPPDRDSGHYSNLE-----  
Od CyclinDd 421 PPPQAASGCTVEASRLQTNFYGEQGVMTKEDIRSLSDKLSLVSSGGVDLKKFADHL

Hs CyclinD1a -----  
Hs CyclinD1b -----  
Mm CyclinD2 -----  
Mm CyclinD2SV -----  
Od CyclinDby -----  
Od CyclinDba -----  
Od CyclinDbd -----  
Od CyclinDbf -----  
Od CyclinDd 481 SIPFEFLRCKYRQLRSKKT

**Figure S1. Multiple sequence alignment of Cyclin Ds and their splice variants.** *O. dioica* Cyclin Dd, and Cyclin Db splice variants aligned with human and mouse Cyclin D splice variants using MUSCLE.<sup>2</sup> Dark shading indicates identical amino acids and grey shading represents similar amino acids. Altered C-terminal end amino acid sequences resulting from alternative splicing are indicated in red. CDK6 (red box) and CKI (p27/p21) interaction regions (blue box) are indicated.<sup>3</sup> Conserved residues for Cyclin Dependent Kinase Activator (CAK) binding on odCyclin D variants are marked with asterisks below the corresponding aligned sequences. Hs, Human; Mm, Mouse; Od, *Oikopleura dioica*.

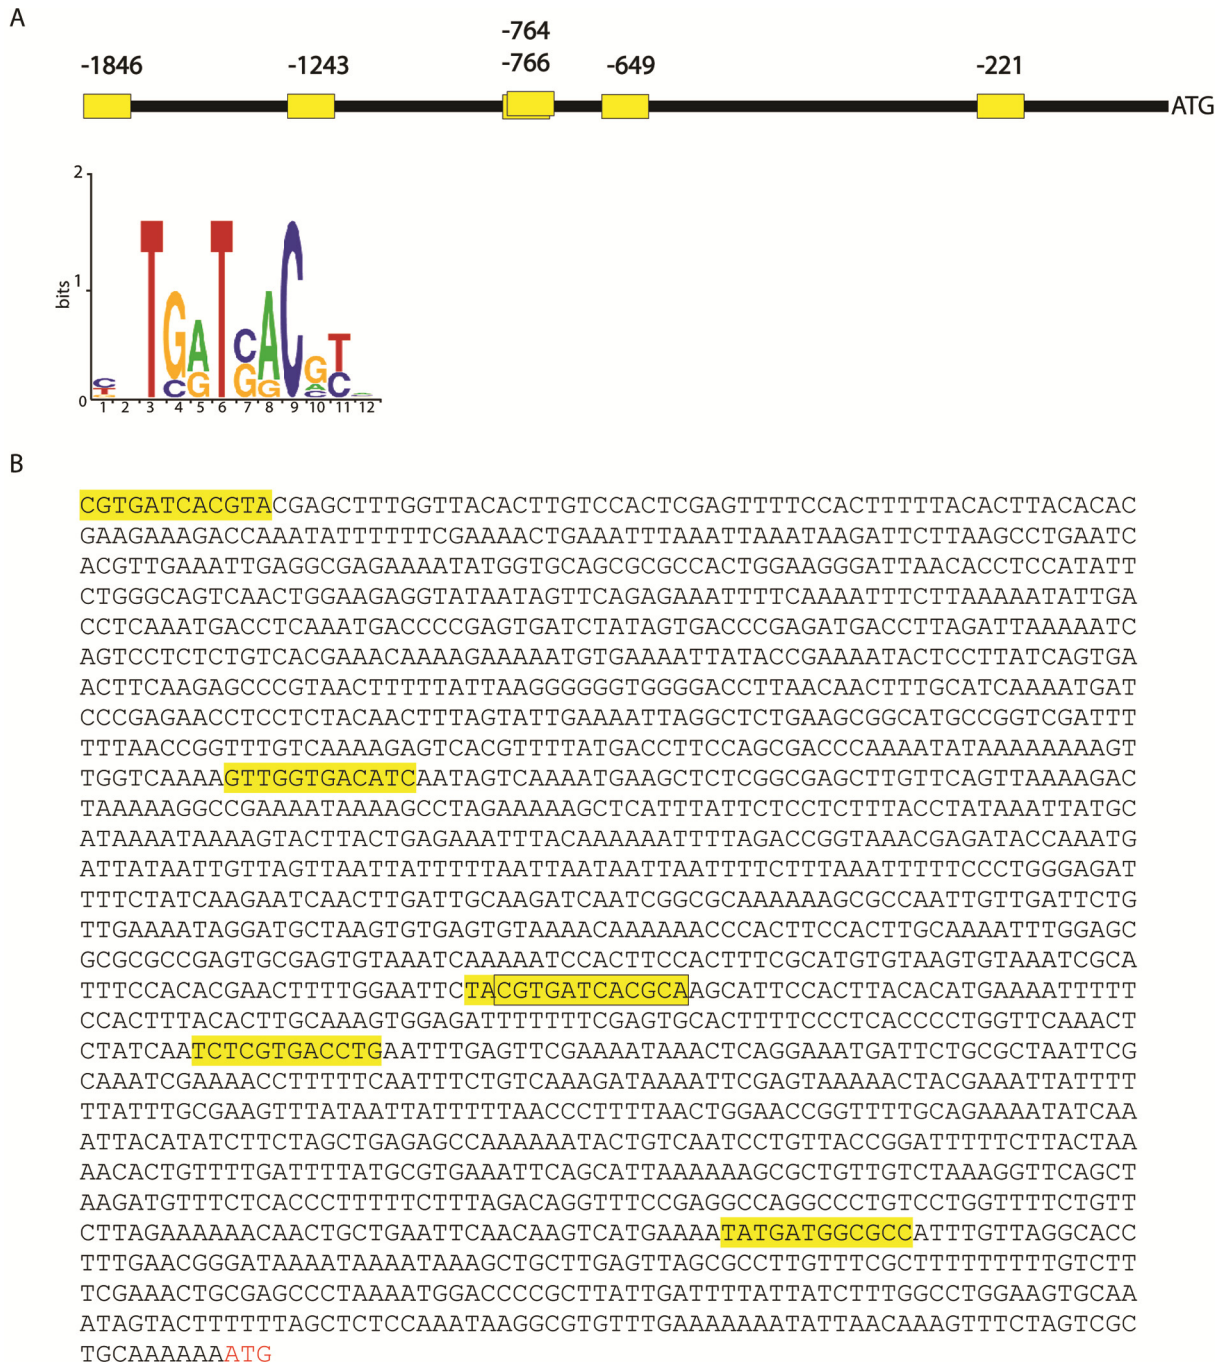

**Figure S2. CREB binding sites upstream of the *Oikopleura dioica cyclin Db* start site.**

The upstream sequence of *cyclin Db* was extracted from the *O. dioica* genome.<sup>4</sup> Predicted consensus *O. dioica* CREB binding sites in this region were identified using JASPAR (<http://jaspar.genereg.net>) and the site sequence logo (A) was created in web logo (<http://weblogo.berkeley.edu/logo.cgi>). These sites are indicated by yellow boxes in (A) and yellow highlighted sequences in (B).

## References

1. Lu FM, Gladden AB, Diehl JA. An alternatively spliced cyclin D1 isoform, cyclin D1b, is a nuclear oncogene. *Cancer Res* 2003; 63:7056-61
2. Edgar RC. MUSCLE: multiple sequence alignment with high accuracy and high throughput. *Nucleic Acids Res* 2004; 32:1792-797.
3. Zwicker J, Brüsselbach S, Jooss KU, Sewing A, Behn M, Lucibello FC, et al. Functional domains in cyclin D1: pRb-kinase activity is not essential for transformation. *Oncogene* 1999; 18:19-25.
4. Denoëud F, Henriët S, Mungpakdee S, Aury JM, Da Silva C, Brinkmann H, et al. Plasticity of animal genome architecture unmasked by rapid evolution of a pelagic tunicate. *Science* 2010; 330:1381-385.
